# Supplementary material for: Tum/RacGAP functions as a switch activating the Pav/kinesin-6 motor
Source: PubMed Central journal article supplement (PMC4838857; doi:10.1038/ncomms11182), 2016-04-19
Supplement: ncomms11182-s1.pdf [file ncomms11182-s1.pdf]

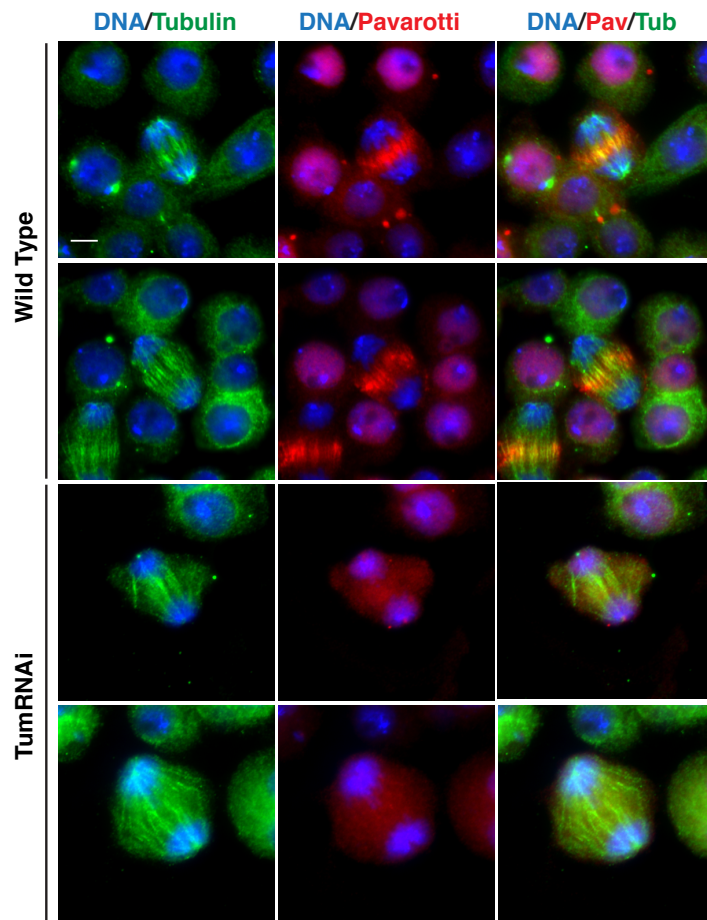

**Supplementary Figure 1.** Spindle organization during early anaphase in wild type and Tum/RacGAP dsRNA treated cells. The panel shows two wild type (rows 1 and 2) and two Tum/RacGAP dsRNA (rows 3 and 4) early anaphase figures. Pav/kinesin-6 antibody in red, tubulin antibody in green and DAPI in blue. Scale bar: 5  $\mu$ m

**Supplementary Table1. Comparison of sedimentation coefficients among centralspindlin's components.**

|                                | Centralspindlin | Pav/Kinesin-6 | Tum1-65 | Pav+Tum1-65 |
|--------------------------------|-----------------|---------------|---------|-------------|
| S value ( $\times 10^{-13}$ s) | 8.7             | 5.7           | 0.06    | 7.9         |
